# Supplementary material for: Understanding silicon monoxide gas evolution from mixed silicon and silica powders
Source: Royal Society of Chemistry journal article supplement (doi:10.1039/d3nh00076a), 2023-01-01
Supplement: d3nh00076a1.pdf [file d3nh00076a1.pdf]

SUPPLEMENTARY INFORMATION:

## Understanding Silicon Monoxide Evolution from Mixed Silicon and Silica Powders

Kevin M. O'Connor, Abbie Rubletz, Jonathan Trach, Cole Butler, and Jonathan G. C. Veinot

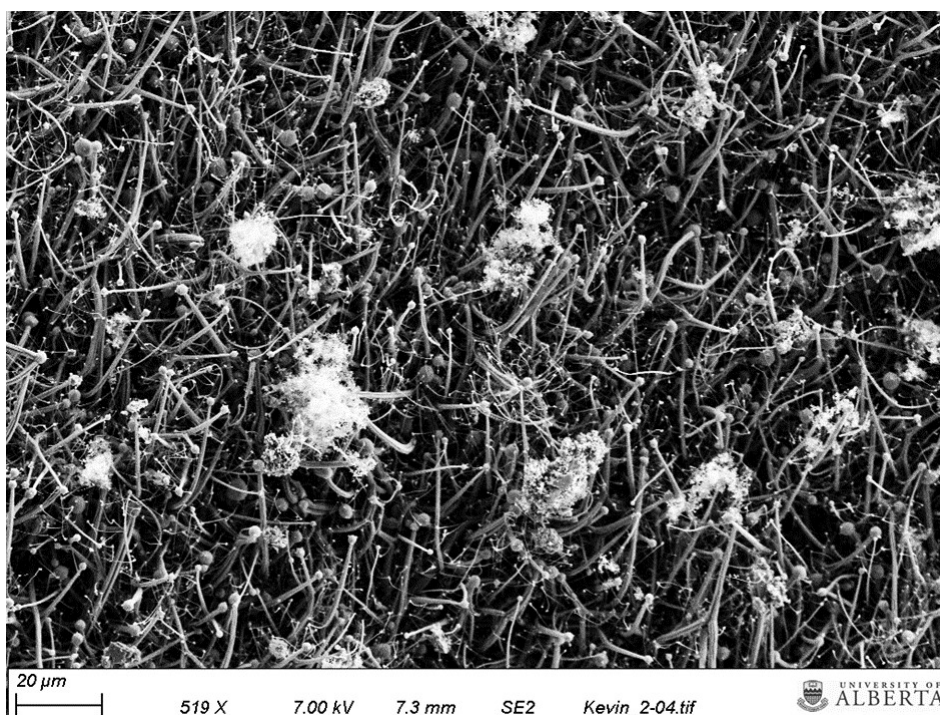

**Figure S1.** SEM of silicon nanowires produced by deposition of silicon monoxide gas.

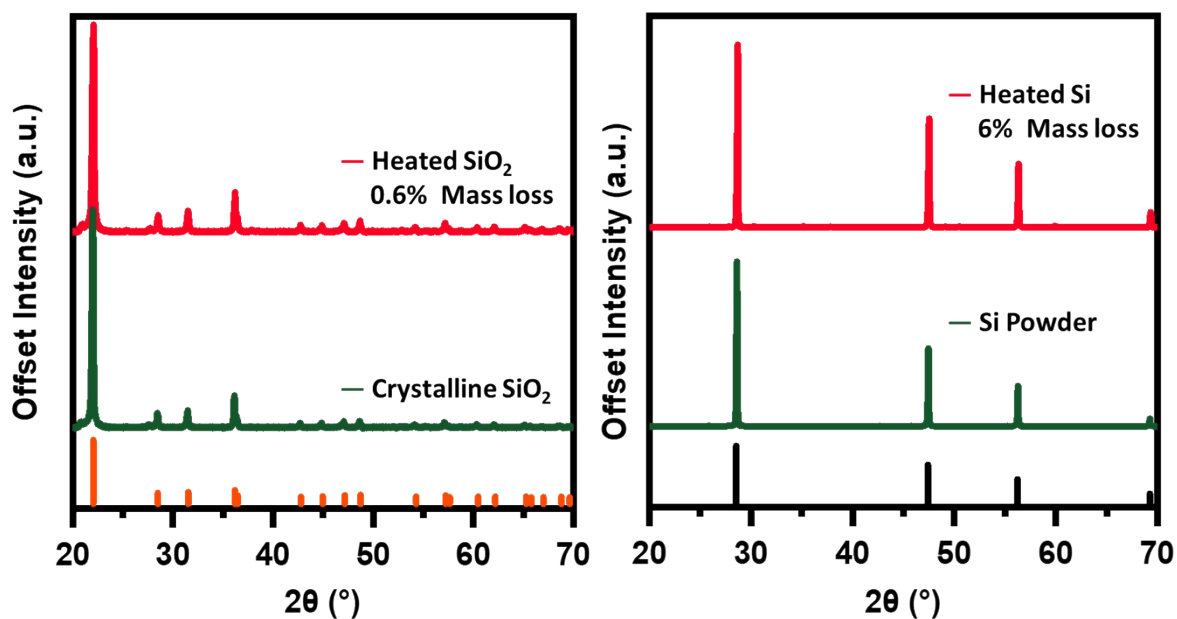

**Figure S2.** Mass loss and pXRD of silica and silicon heated separately. (a) Bulk crystalline SiO<sub>2</sub> (cristobalite) heated independently (without silicon) to 1400°C for 5 hours; (b) silicon powder heated independently (without silica) to 1300°C for 5 hours.

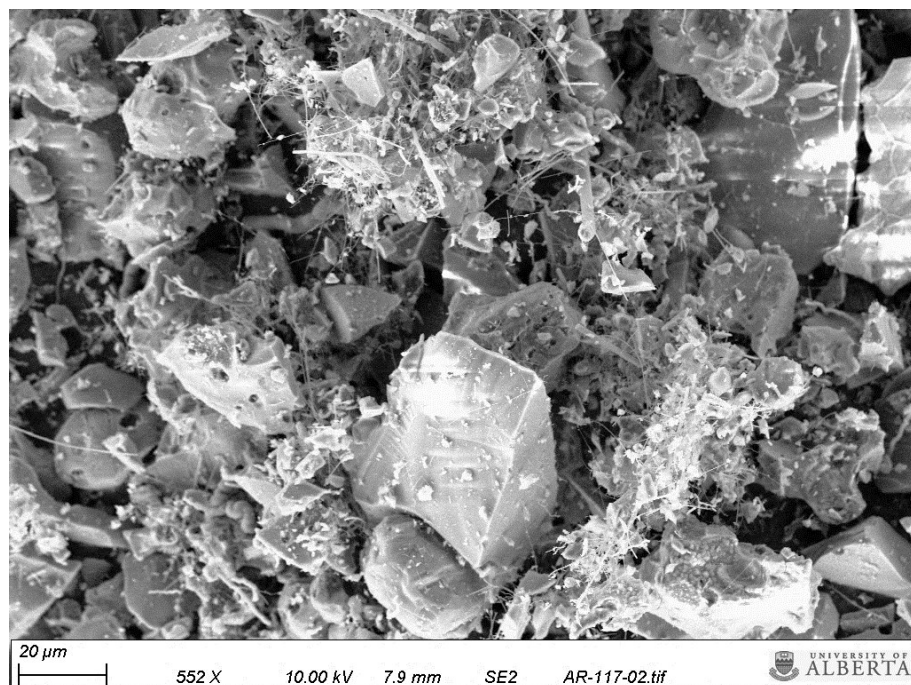

**Figure S3.** Nanowires on the silica/silicon mixtures after thermal treatment.

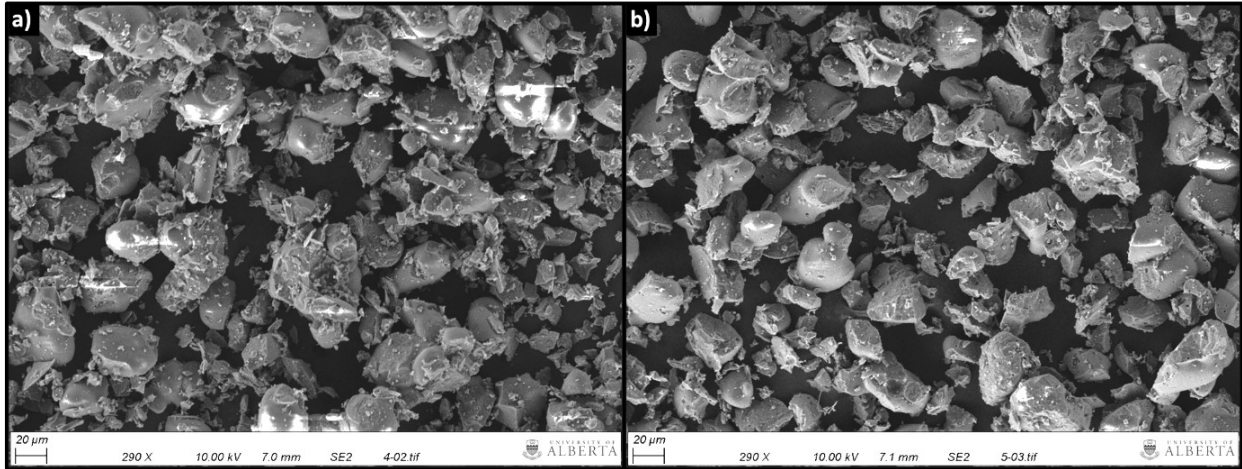

Figure S4. SEM of silicon/silica powder mixtures before and after heating.

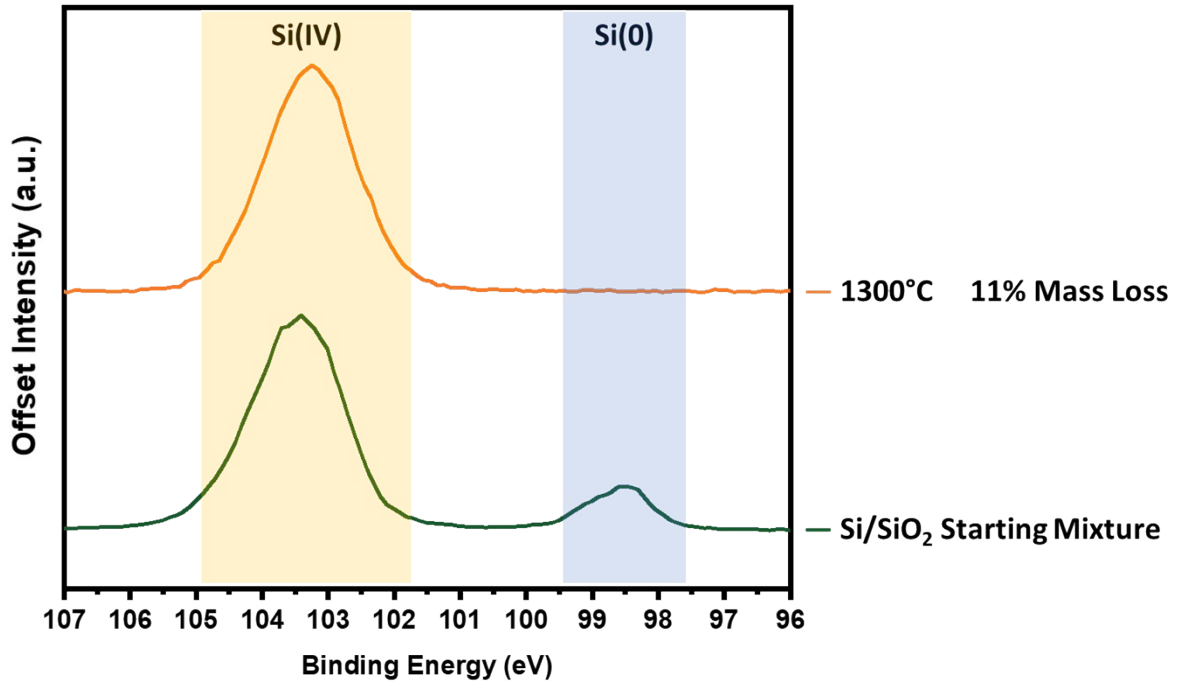

Figure S5. XPS of silicon/silica powder mixtures before and after heating.

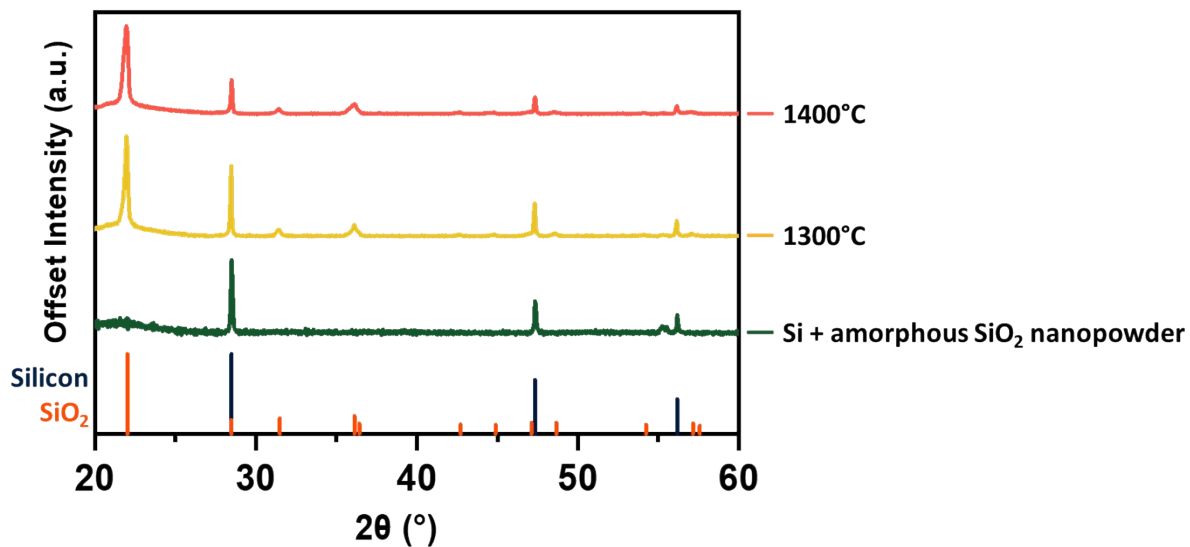

**Figure S6.** Powder X-ray diffraction pattern of silica/silicon mixtures (20:1 by mass), using amorphous silica nanopowder, before and after heating.

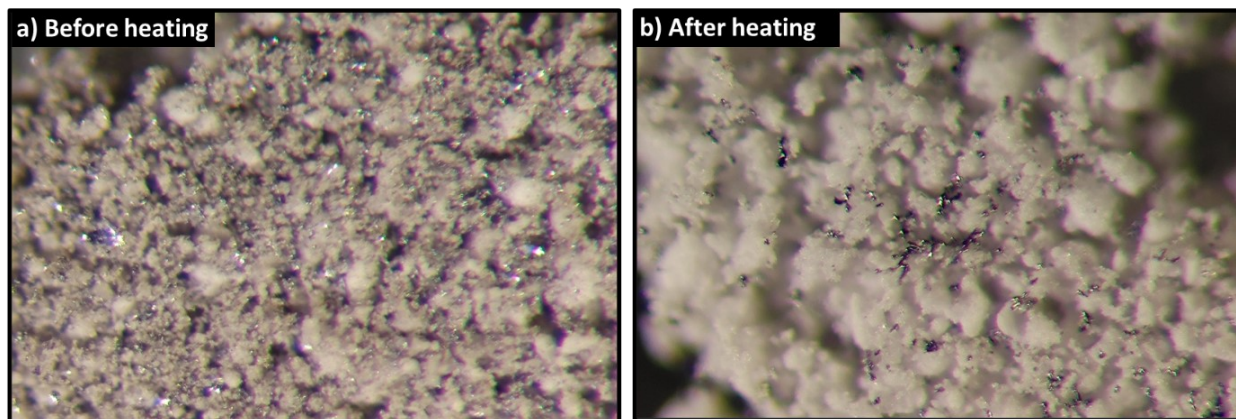

**Figure S7.** Optical images (magnification 160x) of silicon/silica powder mixtures before (a) and after (b) thermal treatment at 1400°C for 5 hours. Silicon to silica ratio 1:4 by mass. Larger relative quantities of silicon results in the Si microparticles melting together after heating.

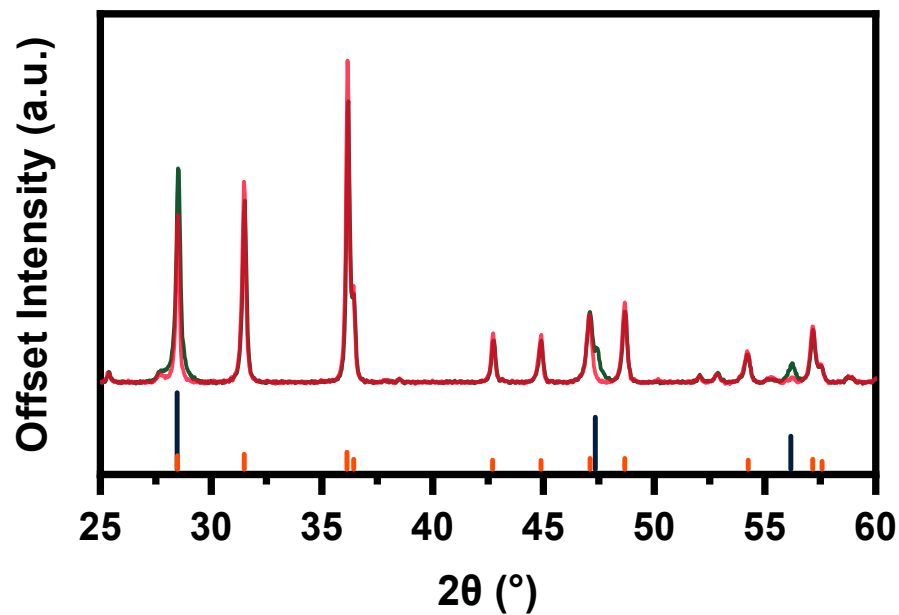

**Figure S8.** Overlaid powder XRD patterns for mixtures of silicon nanoparticles with crystalline SiO<sub>2</sub> (cristobalite) before (green) and after (red) heating at 1300°C for 1 hour. The diffraction peaks associated with Si and SiO<sub>2</sub> are presented below the patterns in blue and orange, respectively. After heating, the peak at 56.2° and the shoulder at 47.4° disappears, indicating a loss of crystalline Si. The peak at 28.5° also becomes less intense.
